# Supplementary material for: Associations of preoperative anemia and postoperative hemoglobin values with hospital costs in total knee arthroplasty (TKA)
Source: Springer Nature journal article supplement (doi:10.1007/s00402-023-04929-4), 2023-06-12
Supplement: MOESM1 [file 402_2023_4929_MOESM1_ESM.pdf]

## Supplementary material

### A. Sensitivity analyses

#### Methods sensitivity analyses

Preoperative anemia was included as a metric variable, instead of the binary variable to reveal possible challenges with the thresholds of anemia. Additionally, the gamma distribution was changed into a gaussian normal distribution to investigate the robustness of the models. GLMs with a gaussian normal distribution as link function are equal to ordinary least squares models, which were suggested for hospital cost analyses with relatively large samples [23].

#### Results sensitivity analyses

Including the preoperative Hb value instead of the binary variable of preoperative anemia for general ward costs indicated a robust model. This was also true for changing the gamma distribution to a normal Gaussian distribution, but the significance with the preoperative anemia was reduced from  $p < 0.01$  to  $p < 0.05$ , and the magnitude of the coefficient was reduced by approximately 23 Euros. For men, the loss of Hb was still highly significant for total costs and general ward costs, merely the coefficient for the general ward costs was reduced by 13 Euros. For women, day 2 postoperatively had nearly the same coefficient with normal Gaussian distribution (only 3 Euros less with the same significance level), whereas the association with general ward costs vanished. In sum, the association of preoperative anemia with general ward costs for women was robust as well as day 2 postoperatively for women and total costs. For men, the Hb loss was robust for both, total costs, and general ward costs.

**Table A: Results sensitivity analyses**

| Normal ward costs per patient            | Men         |                |        | Women       |                |        |
|------------------------------------------|-------------|----------------|--------|-------------|----------------|--------|
| Hemoglobin values                        | Coefficient | R <sup>2</sup> | AIC    | Coefficient | R <sup>2</sup> | AIC    |
| Preoperative                             | N.S.        | 0.308          | 2313.9 | 108.9 **    | 0.187          | 3034.5 |
| Preoperative anemia binary               | N.S.        | 0.301          | 2315.2 | 403.6 *     | 0.193          | 3033.2 |
| Day 1 postoperative                      | N.S.        | 0.307          | 2316.1 | N.S.        | 0.172          | 3040.2 |
| Day 2 postoperative                      | N.S.        | 0.312          | 2314.9 | N.S.        | 0.174          | 3039.6 |
| Discharge                                | N.S.        | 0.323          | 2312.6 | N.S.        | 0.171          | 3040.4 |
| Hemoglobin loss (discharge-preoperative) | -147.9 ***  | 0.363          | 2303.5 | N.S.        | 0.159          | 3043.2 |

  

| Total costs per patient                  | Men         |                |        | Women       |                |        |
|------------------------------------------|-------------|----------------|--------|-------------|----------------|--------|
| Hemoglobin values                        | Coefficient | R <sup>2</sup> | AIC    | Coefficient | R <sup>2</sup> | AIC    |
| Preoperative                             | N.S.        | 0.298          | 2435.9 | 127.8 *     | 0.245          | 3186.0 |
| Preoperative anemia                      | N.S.        | 0.288          | 2438.0 | N.S.        | 0.237          | 3187.8 |
| Day 1 postoperative                      | N.S.        | 0.331          | 2430.7 | -136.4 *    | 0.335          | 3163.2 |
| Day 2 postoperative                      | N.S.        | 0.333          | 2430.3 | -140.8 **   | 0.341          | 3161.5 |
| Discharge                                | -131.2 *    | 0.358          | 2424.8 | N.S.        | 0.327          | 3165.7 |
| Hemoglobin loss (discharge-preoperative) | -291.3 ***  | 0.429          | 2407.4 | N.S.        | 0.316          | 3168.8 |

Hemoglobin in g/dl, CI = confidence intervall, significance levels \* <0.05, \*\*<0.01, \*\*\* <0.001, R<sup>2</sup> = Mc Fadden (1977) R<sup>2</sup>

## B. Model comparison different perioperative Hb values

**Table B: Results for different perioperative Hb values**

| Normal ward costs per patient            | Men              |                |               | Women          |                |               |
|------------------------------------------|------------------|----------------|---------------|----------------|----------------|---------------|
| Hemoglobin values                        | Coefficient      | R <sup>2</sup> | AIC           | Coefficient    | R <sup>2</sup> | AIC           |
| Day 1 postoperative                      | N.S.             | 0.303          | 2315.1        | N.S.           | 0.173          | 3033.4        |
| Day 2 postoperative                      | N.S.             | 0.308          | 2314.2        | <b>0.974 *</b> | <b>0.177</b>   | <b>3032.6</b> |
| Discharge                                | N.S.             | 0.319          | 2311.8        | N.S.           | 0.173          | 3033.5        |
| Hemoglobin loss (discharge-preoperative) | <b>0.943 ***</b> | <b>0.368</b>   | <b>2300.7</b> | N.S.           | 0.159          | 3036.7        |

  

| Total costs per patient                  | Men              |                |               | Women           |                |               |
|------------------------------------------|------------------|----------------|---------------|-----------------|----------------|---------------|
| Hemoglobin values                        | Coefficient      | R <sup>2</sup> | AIC           | Coefficient     | R <sup>2</sup> | AIC           |
| Day 1 postoperative                      | N.S.             | 0.340          | 2423.4        | 0.983 *         | 0.337          | 3154.3        |
| Day 2 postoperative                      | N.S.             | 0.342          | 2423.0        | <b>0.982 **</b> | <b>0.344</b>   | <b>3152.4</b> |
| Discharge                                | 0.984 *          | 0.366          | 2417.3        | N.S.            | 0.329          | 3156.7        |
| Hemoglobin loss (discharge-preoperative) | <b>0.963 ***</b> | <b>0.445</b>   | <b>2397.7</b> | N.S.            | 0.312          | 3160.1        |

Hemoglobin in g/dl, CI = confidence intervall, significance levels \* <0.05, \*\*<0.01, \*\*\* <0.001, R<sup>2</sup> = Mc Fadden (1977) R<sup>2</sup>
